# Supplementary material for: Sodium catalytic phenylpentazole cracking: a theoretical study
Source: Royal Society of Chemistry journal article supplement (doi:10.1039/d3cp04105k), 2024-01-01
Supplement: d3cp04105k1.pdf [file d3cp04105k1.pdf]

## *Electronic Supporting Information*

### **Sodium Catalytic Phenylpentazole Cracking: A Theoretical Study**

#### **Content**

**Fig. S1** The three reaction paths during single-atom Na catalytic  $C_6H_5N_5$  cracking process.

**Fig. S2** The front-line orbital morphology of all compounds for catalytic  $C_6H_5N_5$  cracking by single-atom Na.

**Fig. S3** Geometric parameters of  $N_2$  adsorption on Na(111) surface [Bond length in nm].

**Fig. S4** The DOS of the Na(111),  $C_6H_5N_5$ -Na(111), PB1, PB2, and PB3.

**Fig. S5** The PDOS of five N atoms in the  $C_6H_5N_5$ -Na(111).

**Fig. S6** The PDOS of five N atoms in the PB1.

**Fig. S7** The PDOS of five N atoms in the PB2.

**Fig. S8** The PDOS of five N atoms in the PB3.

**Fig. S9** The configuration diagram of a hydrogen bond between  $C_6H_5N_5$  and a THF molecule. In (a), one hydrogen bond is O in THF and H in the benzene ring to form O-H bond, the other is methylene H in THF and N to form N-H bond, and both hydrogen bonds in (b) are N-H bonds.

**Fig. S10** Geometric parameters of the Na(111) surface catalytic  $C_6H_5N_5$  cracking to release  $N_2$  under an explicit solvent model( in GGA-PW91 level) [Bond length in nm].

**Fig. S11** Geometric parameters of all compounds on the  $C_6H_5N_5$  pyrolysis to release  $N_2$  without catalyst [Bond length in nm].

**Fig. S12** The front-line orbital morphology of all compounds on the  $C_6H_5N_5$  pyrolysis to release  $N_2$  without catalyst.

**Table S1** The charge (in e) of some atoms and groups in compounds during single-atom Na catalytic  $C_6H_5N_5$  cracking process.

**Table S2** Relative energies [ $E_{rel}/(kcal/mol)$ ] and frequencies  $\nu(cm^{-1})$  of the reaction paths during catalytic  $C_6H_5N_5$  cracking reaction by single-atom Na.

**Table S3** Total energy [ $E(a.u.)$ ] and adsorption energy of  $C_6H_5N_5$  at various adsorption sites on Na(111) surface under gas phase and COSMO conditions.

**Table S4** Total energy [ $E(a.u.)$ ] and adsorption energy [ $E_{ads}/(eV)$ ] of  $N_2$  at various adsorption sites on Na(111) surface under gas phase conditions.

**Table S5** Relative energies [ $E_{rel}/(kcal/mol)$ ] of the released  $N_2$  reaction paths.

**Table S6** Relative energies [ $E_{rel}/(kcal/mol)$ ] and frequencies  $\nu(cm^{-1})$  of the reaction paths during  $C_6H_5N_5$  cracking reaction.

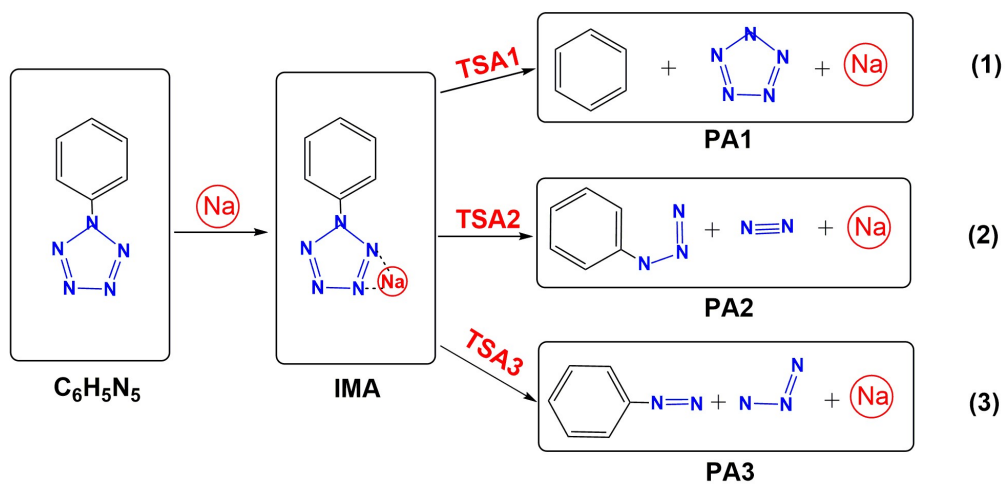

**Fig. S1** The three reaction paths during single-atom Na catalytic  $C_6H_5N_5$  cracking process.

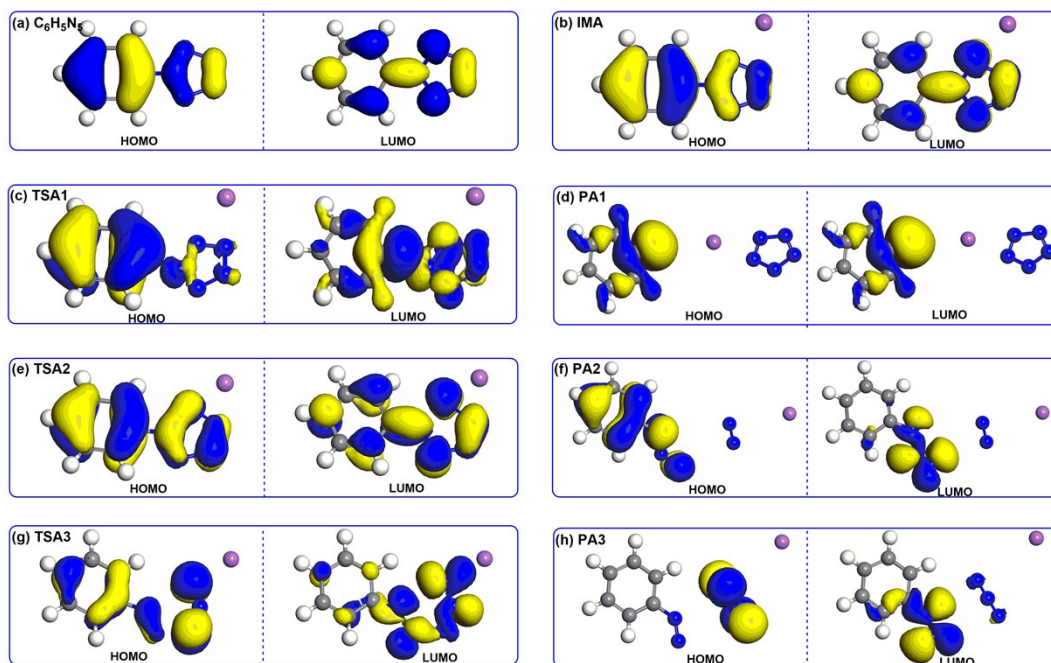

**Fig. S2** The front-line orbital morphology of all compounds for catalytic  $C_6H_5N_3$  cracking by single-atom Na.

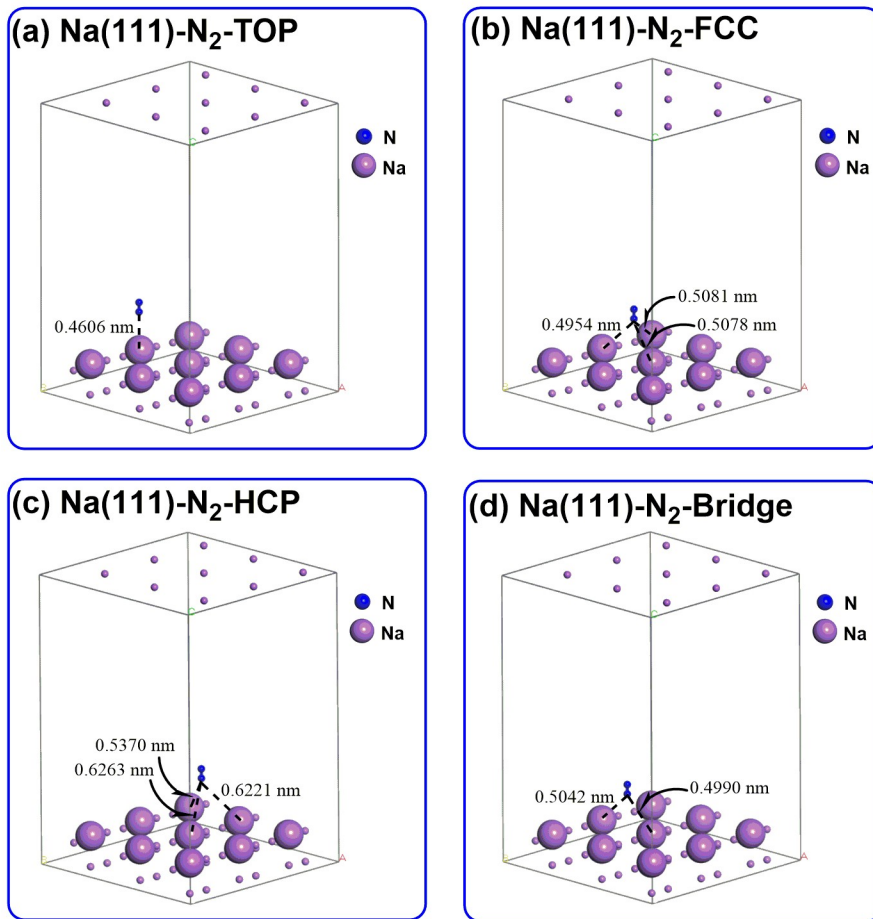

**Fig. S3** Geometric parameters of N<sub>2</sub> adsorption on Na(111) surface [Bond length in nm].

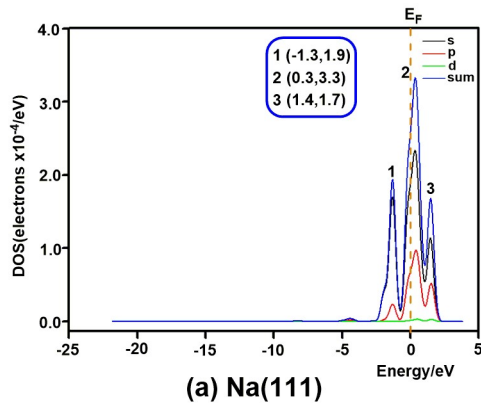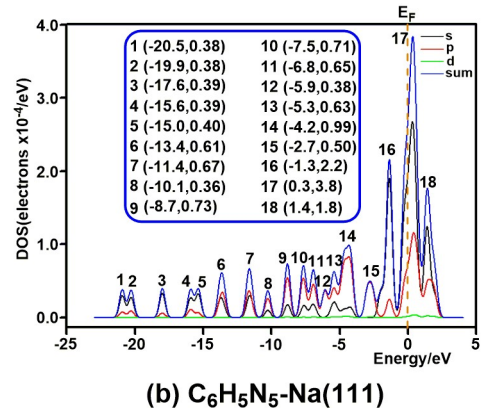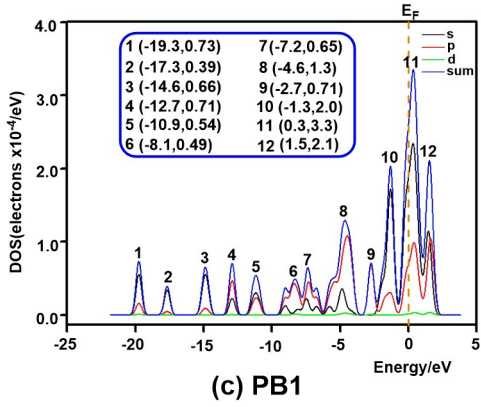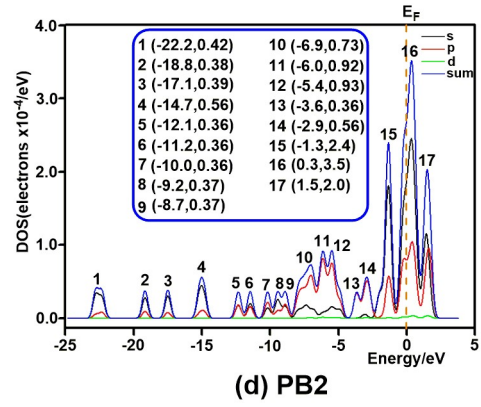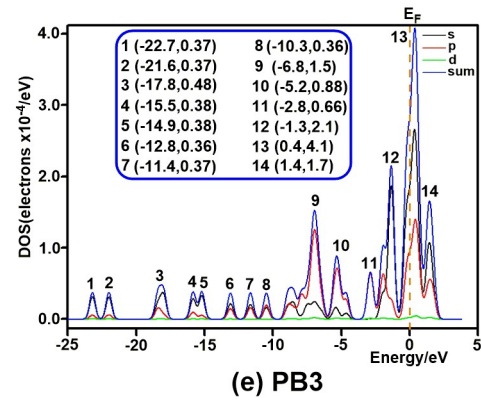

Fig. S4 The PDOS of the Na(111), C<sub>6</sub>H<sub>5</sub>N<sub>5</sub>-Na(111), PB1, PB2, and PB3.

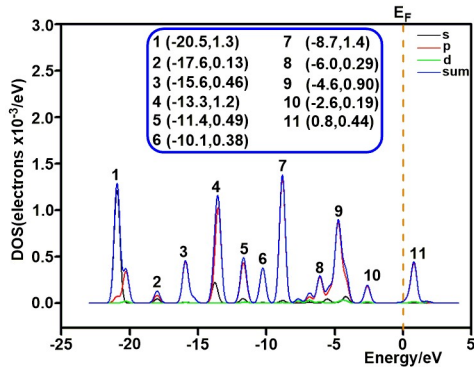

(a)  $C_6H_5N_5-Na(111)-N1$

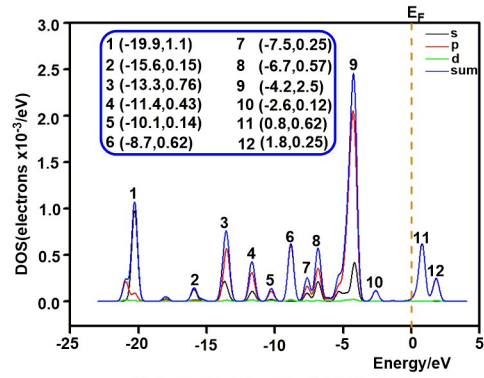

(b)  $C_6H_5N_5-Na(111)-N2$

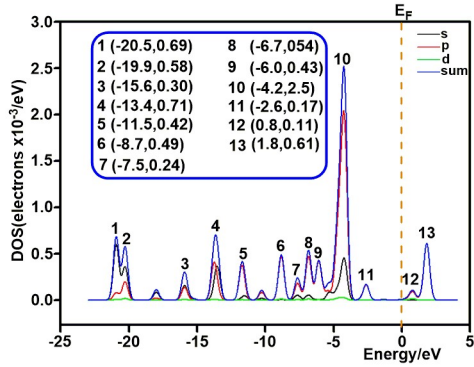

(c)  $C_6H_5N_5-Na(111)-N3$

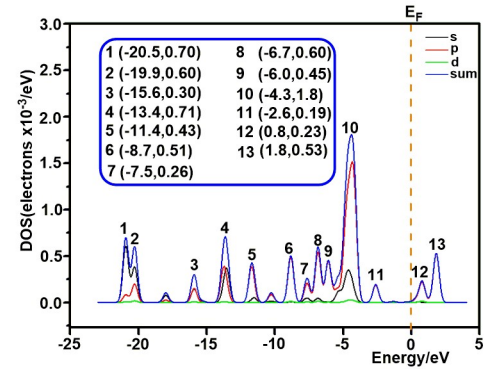

(d)  $C_6H_5N_5-Na(111)-N4$

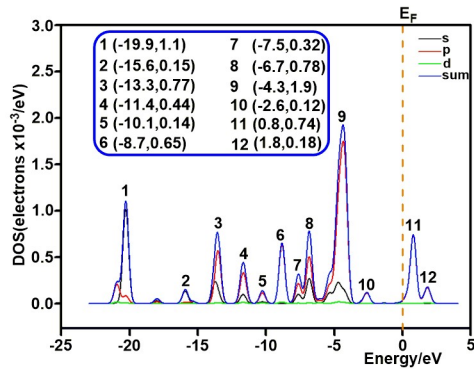

(e)  $C_6H_5N_5-Na(111)-N5$

Fig. S5 The PDOS of five N atoms in the  $C_6H_5N_5-Na(111)$ .

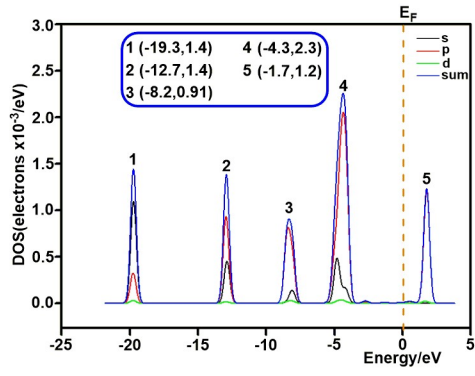

(a) PB1-N1

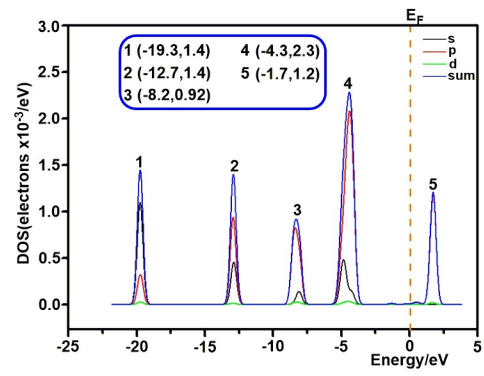

(b) PB1-N2

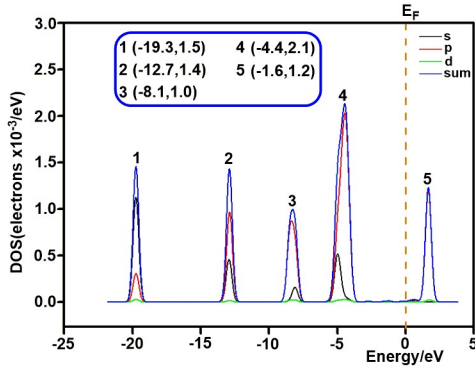

(c) PB1-N3

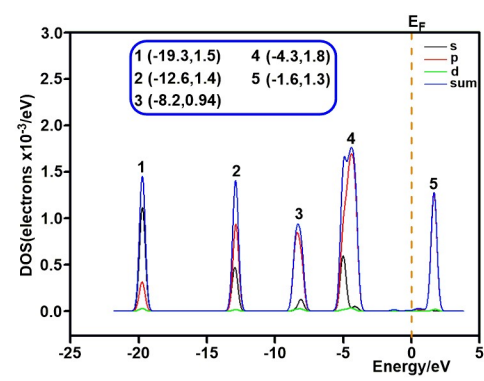

(d) PB1-N4

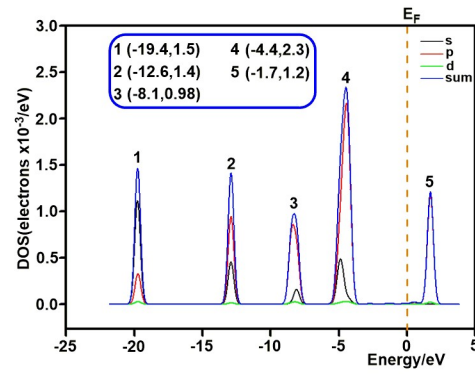

(e) PB1-N5

Fig. S6 The PDOS of five N atoms in the PB1.

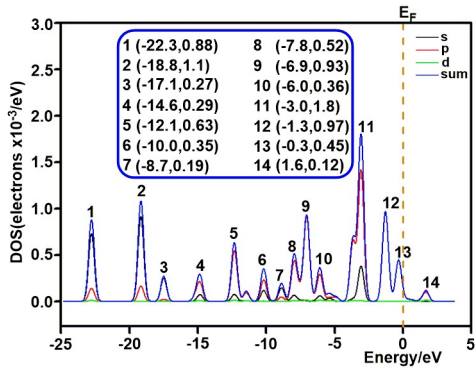

(a) PB2-N1

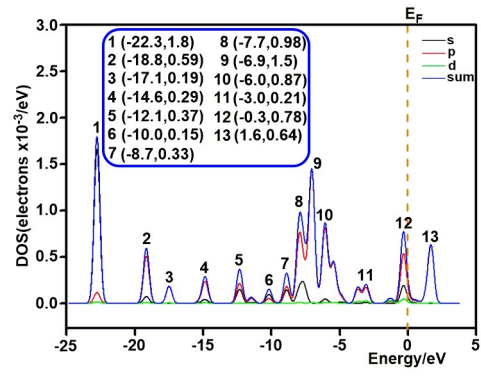

(b) PB2-N2

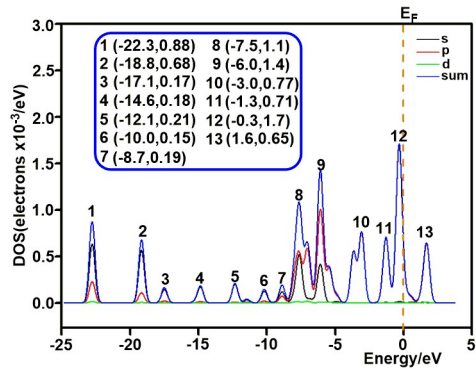

(c) PB2-N3

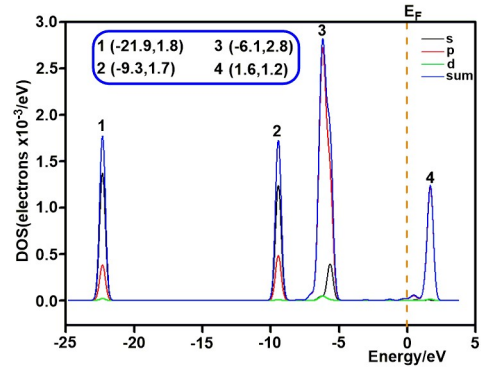

(d) PB2-N4

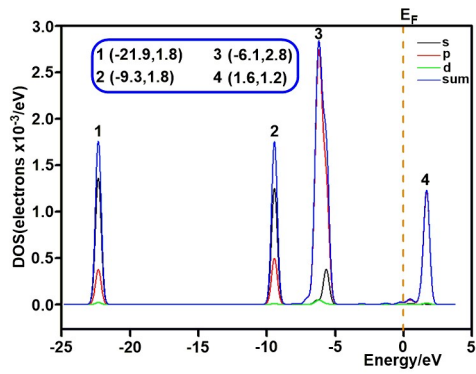

(e) PB2-N5

Fig. S7 The PDOS of five N atoms in the PB2.



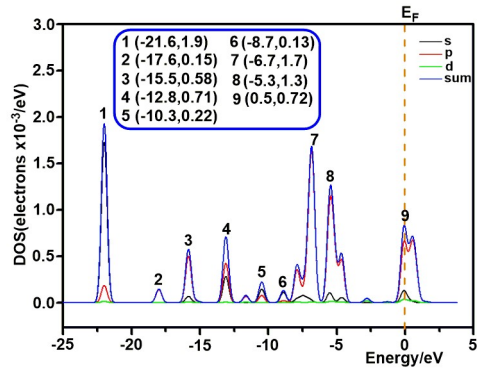

(a) PB3-N1

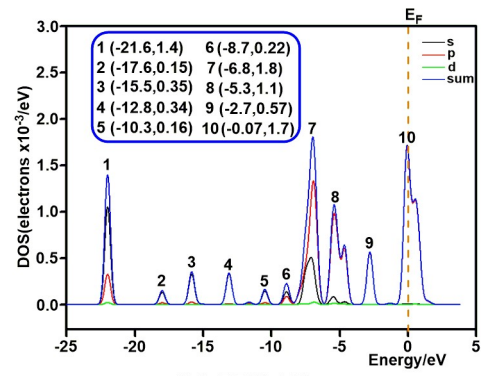

(b) PB3-N2

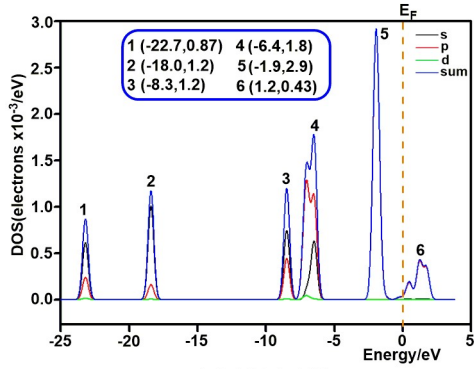

(c) PB3-N3

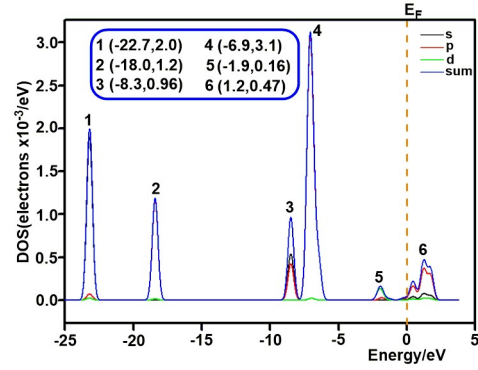

(d) PB3-N4

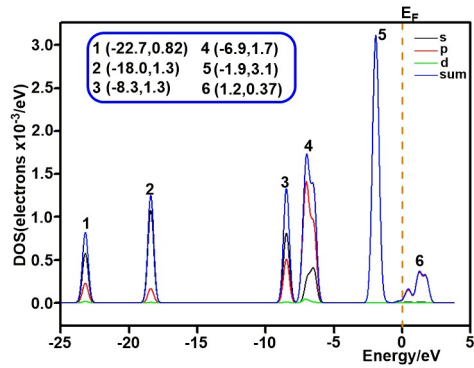

(e) PB3-N5

Fig. S8 The PDOS of five N atoms in the PB3.

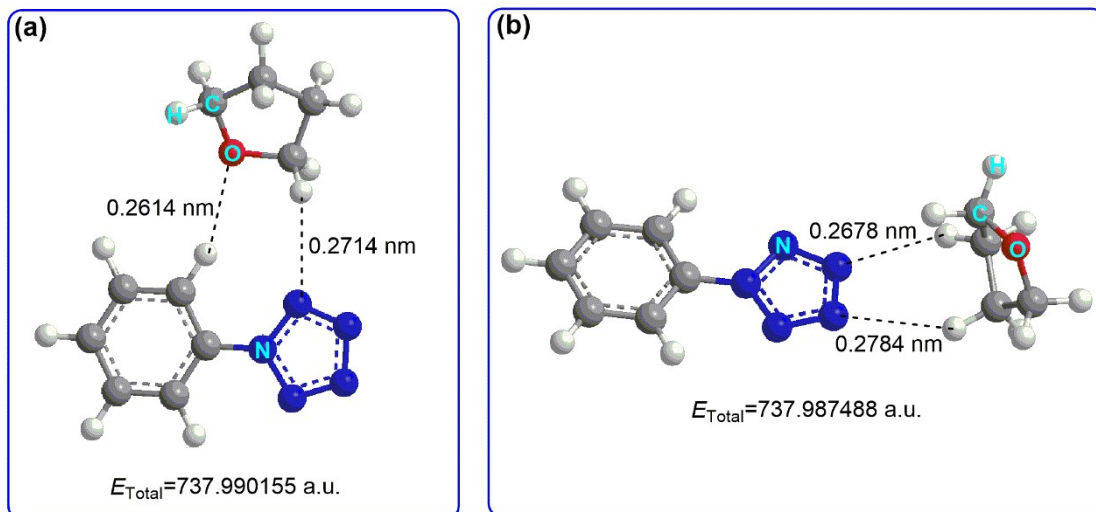

**Fig. S9** The configuration diagram of a hydrogen bond between  $\text{C}_6\text{H}_5\text{N}_5$  and a THF molecule. In (a), one hydrogen bond is O in THF and H in the benzene ring to form O-H bond, the other is methylene H in THF and N to form N-H bond, and both hydrogen bonds in (b) are N-H bonds.

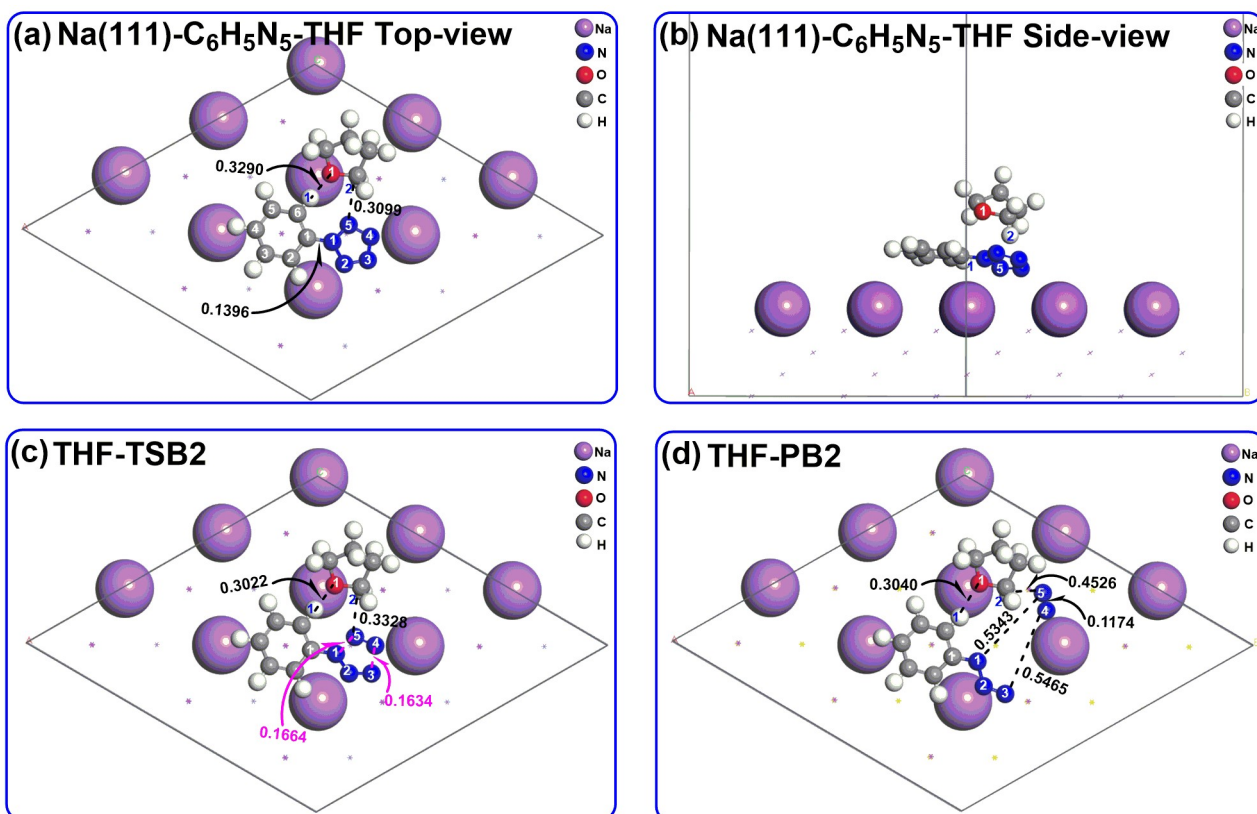

**Fig. S10** Geometric parameters of the Na(111) surface catalytic C<sub>6</sub>H<sub>5</sub>N<sub>5</sub> cracking to release N<sub>2</sub> under an explicit solvent model( in GGA-PW91 level) [Bond length in nm].

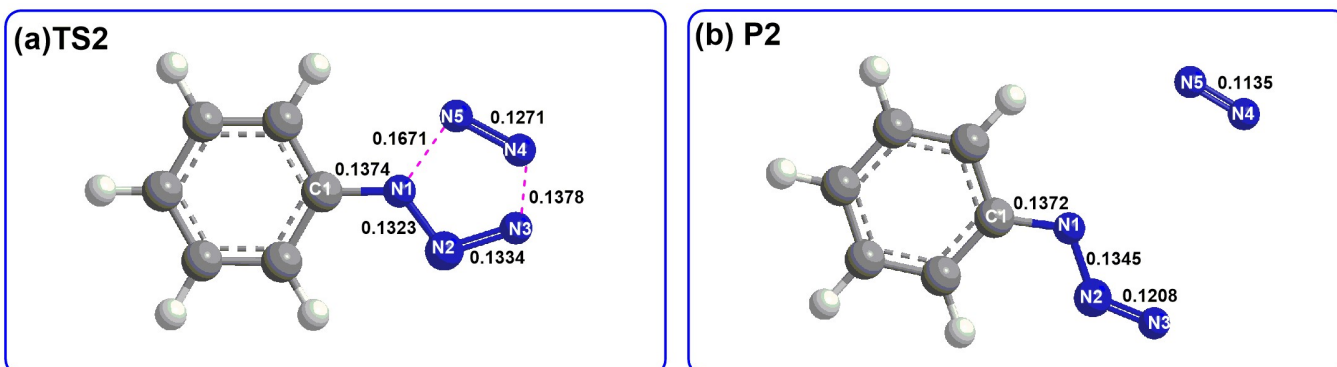

**Fig. S11** Geometric parameters of all compounds on the  $C_6H_5N_5$  pyrolysis to release  $N_2$  without catalyst [Bond length in nm].

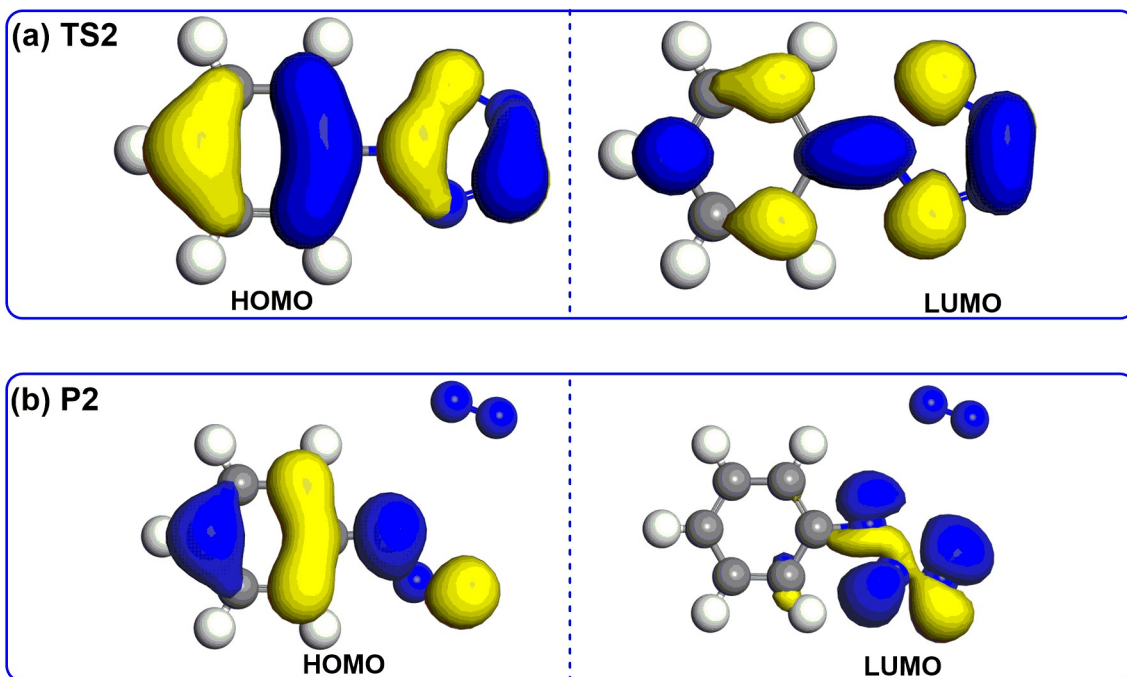

**Fig. S12** The front-line orbital morphology of all compounds on the  $C_6H_5N_5$  pyrolysis to release  $N_2$  without catalyst.

**Table S1** The charge (in e) of some atoms and groups in compounds during single-atom Na catalytic C<sub>6</sub>H<sub>5</sub>N<sub>5</sub> cracking process.

| Species                                      | C1     | N1     | N2     | N3     | N4     | N5     | Na    |
|----------------------------------------------|--------|--------|--------|--------|--------|--------|-------|
| C <sub>6</sub> H <sub>5</sub> N <sub>5</sub> | 0.197  | -0.025 | -0.088 | -0.060 | -0.060 | -0.088 | -     |
| IMA                                          | 0.108  | -0.012 | -0.134 | -0.085 | -0.201 | -0.236 | 0.588 |
| TSA1                                         | -0.034 | -0.081 | -0.069 | -0.069 | -0.143 | -0.143 | 0.416 |
| PA1                                          | -0.089 | -0.121 | -0.123 | -0.121 | -0.213 | -0.214 | 0.787 |
| TSA2                                         | 0.141  | -0.088 | -0.061 | -0.084 | -0.104 | -0.212 | 0.363 |
| PA2                                          | 0.027  | -0.159 | 0.039  | -0.142 | -0.082 | -0.098 | 0.252 |
| TSA3                                         | 0.148  | -0.072 | -0.111 | -0.130 | 0.077  | -0.326 | 0.413 |
| PA3                                          | 0.055  | -0.034 | -0.139 | -0.192 | 0.177  | -0.235 | 0.244 |

**Table S2** Relative energies [ $E_{rel}$ /(kcal/mol)] and frequencies  $\nu$ (cm<sup>-1</sup>) of the reaction paths during catalytic C<sub>6</sub>H<sub>5</sub>N<sub>5</sub> cracking reaction by single-atom Na.

| Species | Gas                   |                           | COSMO                  |                           |
|---------|-----------------------|---------------------------|------------------------|---------------------------|
|         | $E_{rel}$ (kcal/mol)* | $\nu$ (cm <sup>-1</sup> ) | $E_{rel}$ (kcal/mol)** | $\nu$ (cm <sup>-1</sup> ) |
| IMA     | -18.6                 | -                         | -10.8                  | -                         |
| TSA1    | 3.6                   | -146.9                    | 11.8                   | -169.4                    |
| PA1     | -0.3                  | -                         | 0.5                    | -                         |
| TSA2    | -16.3                 | -411.4                    | -6.5                   | -413.6                    |
| PA2     | -54.1                 | -                         | -49.5                  | -                         |
| TSA3    | -18.4                 | -466.2                    | -6.6                   | -392.6                    |
| PA3     | -35.1                 | -                         | -34.6                  | -                         |

\*The relative reference data is  $E_0(\text{Gas})=-666.241883$  a.u., and  $E_0(\text{Gas})$  is the total energy of C<sub>6</sub>H<sub>5</sub>N<sub>5</sub> and one Na atom in the gas phase condition.

\*\*The relative reference data is  $E_0(\text{Solvation})=-666.494934$  a.u., where  $E_0(\text{Solvation})$  is the total energy of C<sub>6</sub>H<sub>5</sub>N<sub>5</sub> and one Na atom under COSMO conditions.

**Table S3** Total energy [ $E(\text{a.u.})$ ] and adsorption energy of  $\text{C}_6\text{H}_5\text{N}_5$  at various adsorption sites on Na(111) surface under gas phase and COSMO conditions.

| Adsorption site                                 | Gas                |                             |
|-------------------------------------------------|--------------------|-----------------------------|
|                                                 | $-E/(\text{a.u.})$ | COSMO<br>$-E/(\text{a.u.})$ |
| $\text{C}_6\text{H}_5\text{N}_5+\text{Na}(111)$ | 13477.722133       | 13477.731416                |
| Top                                             | 13477.684909       | 13477.692712                |
| FCC                                             | 13477.693251       | 13477.698760                |
| HCP                                             | 13477.687032       | 13477.689129                |
| LB                                              | 13477.689157       | 13477.688483                |
| SB                                              | 13477.679287       | 13477.691028                |

**Table S4** Total energy [ $E(\text{a.u.})$ ] and adsorption energy [ $E_{\text{ads}}/(\text{eV})$ ] of  $\text{N}_2$  at various adsorption sites on Na(111) surface under gas phase conditions.

| Adsorption site             | Gas                |                              |
|-----------------------------|--------------------|------------------------------|
|                             | $-E/(\text{a.u.})$ | $E_{\text{ads}}/(\text{eV})$ |
| $\text{N}_2+\text{Na}(111)$ | 7415.309509        | -                            |
| Top                         | 7415.324420        | -0.41                        |
| FCC                         | 7415.325530        | -0.44                        |
| HCP                         | 7415.323979        | -0.39                        |
| Bridge                      | 7415.324981        | -0.42                        |

**Table S5** Relative energies [ $E_{rel}/(\text{kcal/mol})$ ] of the released  $\text{N}_2$  reaction paths.

| Species | COSMO     |           | Explicit Solvation |           |
|---------|-----------|-----------|--------------------|-----------|
|         | GGA-PW91* | GGA-PBE** | GGA-PW91*          | GGA-PBE** |
| TSB2    | 5.2       | 7.4       | 9.8                | 10.2      |
| PB2     | -55.5     | -55.4     | -58.7              | -57.4     |

Notes:

\* In GGA-PW91 level, the relative reference data  $E_0$  are -7801.943028 and -8043.814061 a.u. under the continuum solvent model (COSMO) and explicit solvent model, respectively.

\*\* In GGA-PBE level, the relative reference data  $E_0$  are -7806.770315 and -8039.056739 a.u. under the continuum solvent model (COSMO) and explicit solvent model, respectively.

**Table S6** Relative energies [ $E_{rel}/(\text{kcal/mol})$ ] and frequencies  $\nu(\text{cm}^{-1})$  of the reaction paths during  $\text{C}_6\text{H}_5\text{N}_5$  cracking reaction.

| Species | Gas                          |                       | COSMO                           |                       |
|---------|------------------------------|-----------------------|---------------------------------|-----------------------|
|         | $E_{rel}(\text{kcal/mol})^*$ | $\nu(\text{cm}^{-1})$ | $E_{rel}(\text{kcal/mol})^{**}$ | $\nu(\text{cm}^{-1})$ |
| TS2     | 10.2                         | -387.3                | 13.2                            | -381.8                |
| P2      | -45.3                        | -                     | -44.0                           | -                     |

Notes:

\*The relative reference data is  $E_0(\text{Gas})=-505.493958$  a.u., and  $E_0(\text{Gas})$  is the total energy of  $\text{C}_6\text{H}_5\text{N}_5$  in the gas phase.

\*\*The relative reference data is  $E_0(\text{Solvation})=-505.502106$  a.u., where  $E_0(\text{Solvation})$  is the total energy of  $\text{C}_6\text{H}_5\text{N}_5$  under COSMO.
